# Supplementary material for: Energy transfer within responsive pi-conjugated coassembled peptide-based nanostructures in aqueous environments
Source: PubMed Central journal article supplement (PMC5811113; doi:10.1039/c4sc03122a), 2014-12-05
Supplement: SC-006-C4SC03122A-s001.pdf [file SC-006-C4SC03122A-s001.pdf]

## Supporting Information

### **Energy transfer within responsive pi-conjugated coassembled peptide-based nanostructures in aqueous environments**

Herdeline Ann M. Ardoña <sup>a,c</sup> and John D. Tovar <sup>a,b,c</sup>

---

<sup>a</sup> Department of Chemistry, Krieger School of Arts and Sciences, Johns Hopkins University, 3400 N. Charles St., Baltimore, MD 21218 USA;

<sup>b</sup> Institute for NanoBioTechnology, Whiting School of Engineering, Johns Hopkins University, 3400 N. Charles St., Baltimore, MD 21218 USA

<sup>c</sup> Department of Materials Science and Engineering, Whiting School of Engineering; Johns Hopkins University, 3400 N. Charles St., Baltimore, MD 21218 USA

*Email:* tovar@jhu.edu; *Web:* <http://pages.jhu.edu/chem/tovar>; *Tel:* +14105166065

#### **CONTENTS**

##### *Characterization data*

|                                          |      |
|------------------------------------------|------|
| <sup>1</sup> H NMR spectra.....          | S2   |
| ESI spectra/ Analytical HPLC traces..... | S3-4 |
| ATR-IR spectra.....                      | S5   |

##### *Supplementary data*

|                                                    |        |
|----------------------------------------------------|--------|
| DLS data.....                                      | S6-7   |
| Energy-minimized models.....                       | S8     |
| ATR-IR data of lyophilized acidic solutions.....   | S9     |
| Supplementary TEM images.....                      | S10    |
| Supplementary absorption and emission spectra..... | S11-15 |
| Fluorescence lifetime decay profiles.....          | S13    |

## CHARACTERIZATION DATA

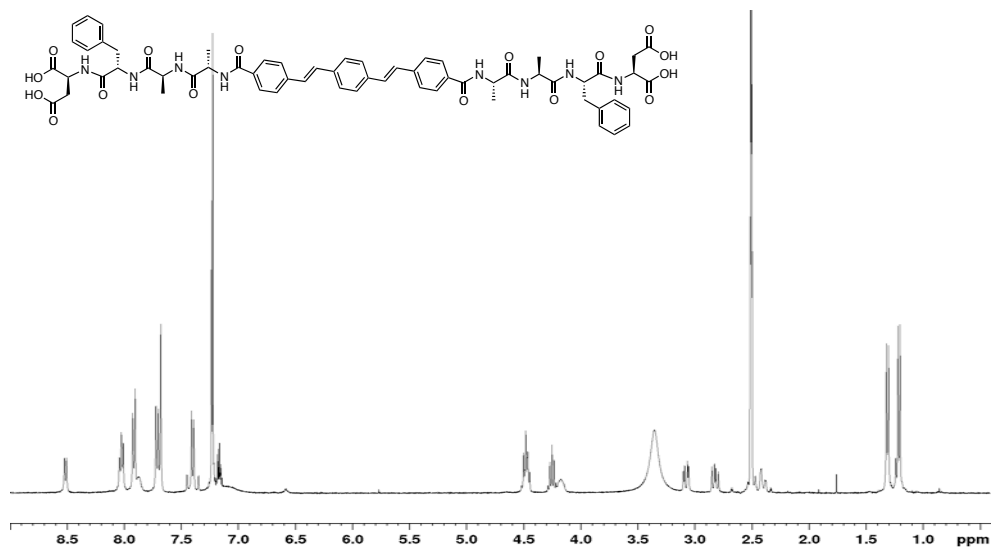

**Fig. S1.** <sup>1</sup>H (400 MHz, DMSO) NMR of HO-(DFAA)<sub>2</sub>-OPV3 peptide.

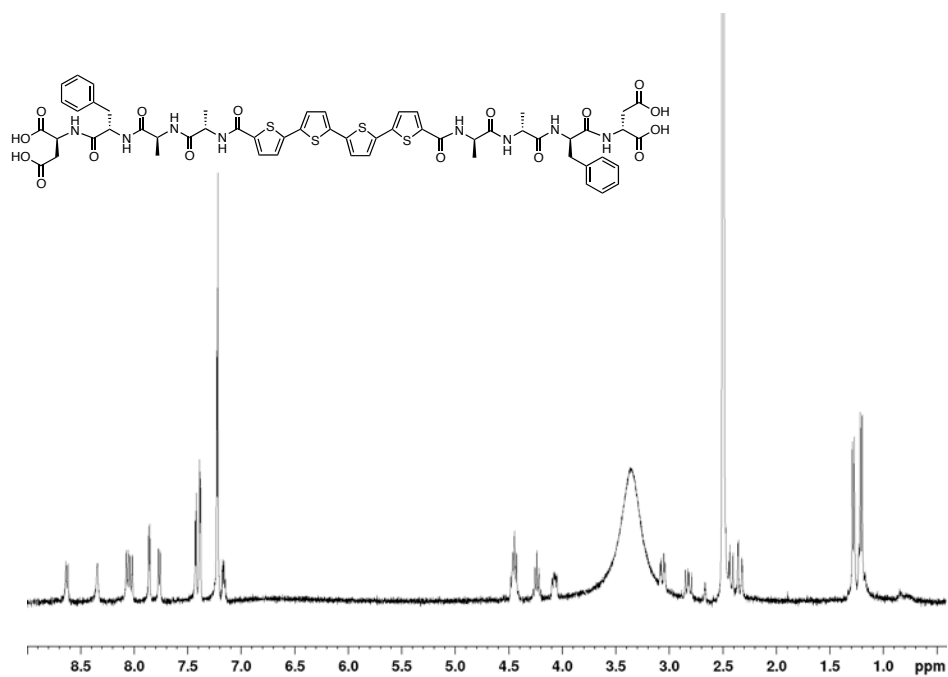

**Fig. S2.** <sup>1</sup>H (400 MHz, DMSO) NMR of HO-(DFAA)<sub>2</sub>-4T peptide.

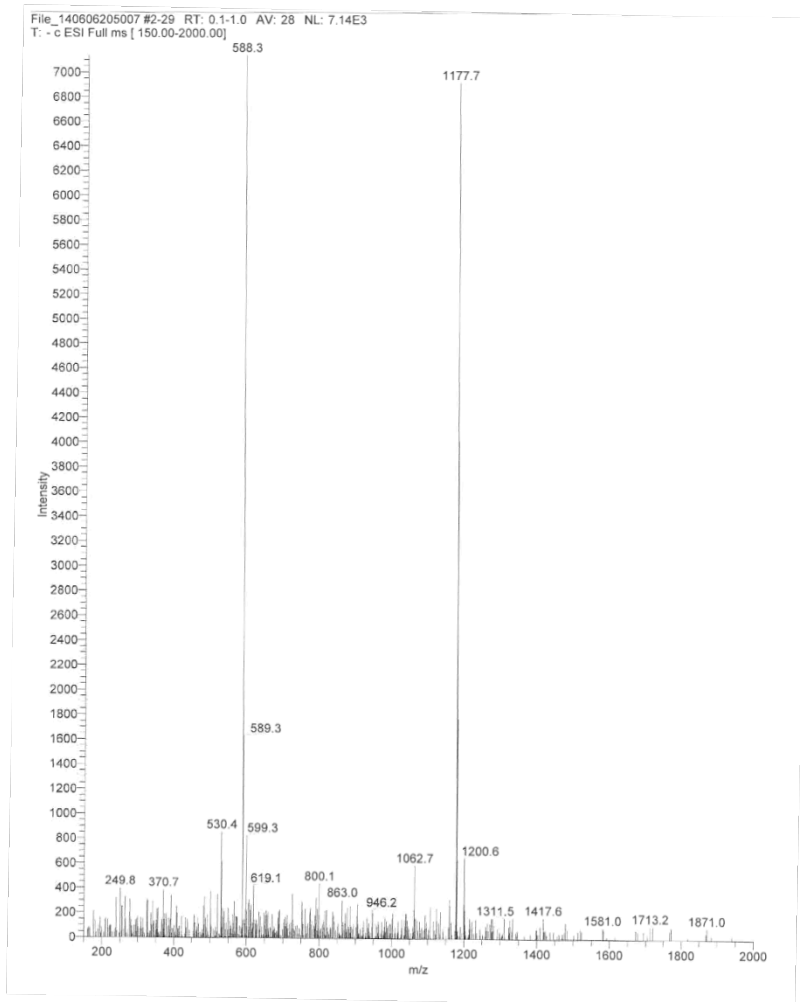

**Fig. S3.** ESI of HO-(DFAA)<sub>2</sub>-OPV3 peptide.

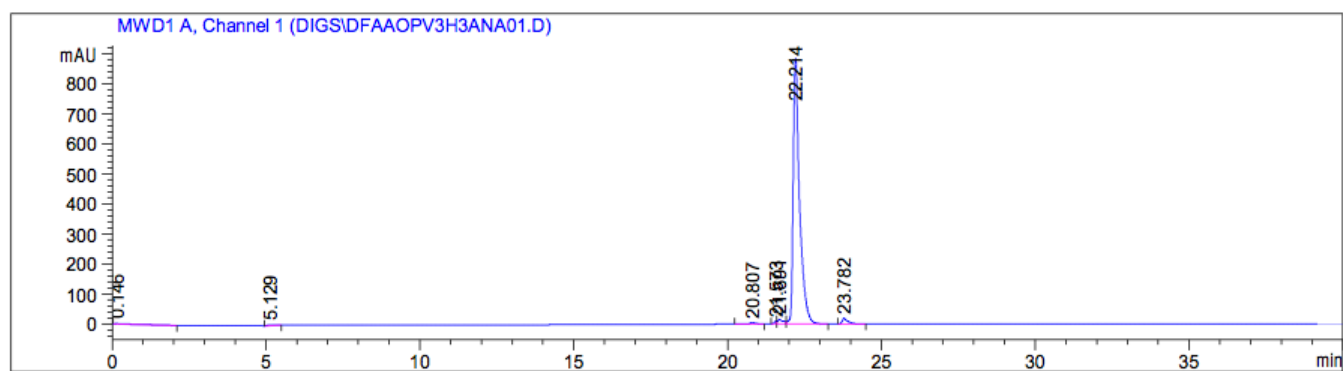

**Fig. S4.** Analytical HPLC trace of HO-(DFAA)<sub>2</sub>-OPV3, monitoring at 365 nm.

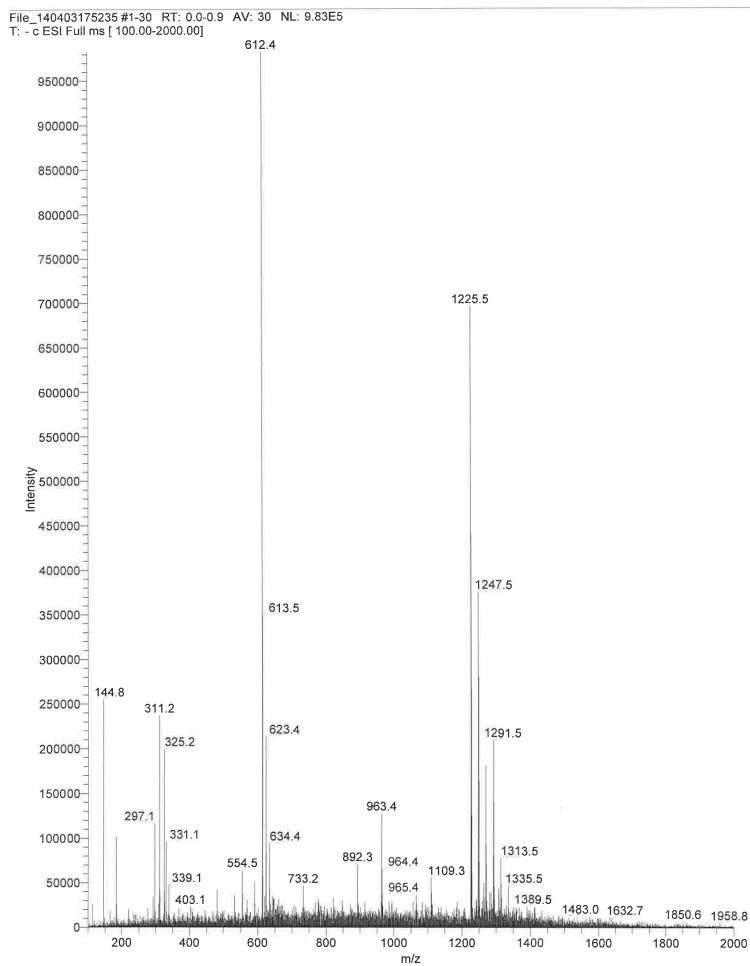

**Fig. S5.** ESI of HO-(DFAA)<sub>2</sub>-4T peptide.

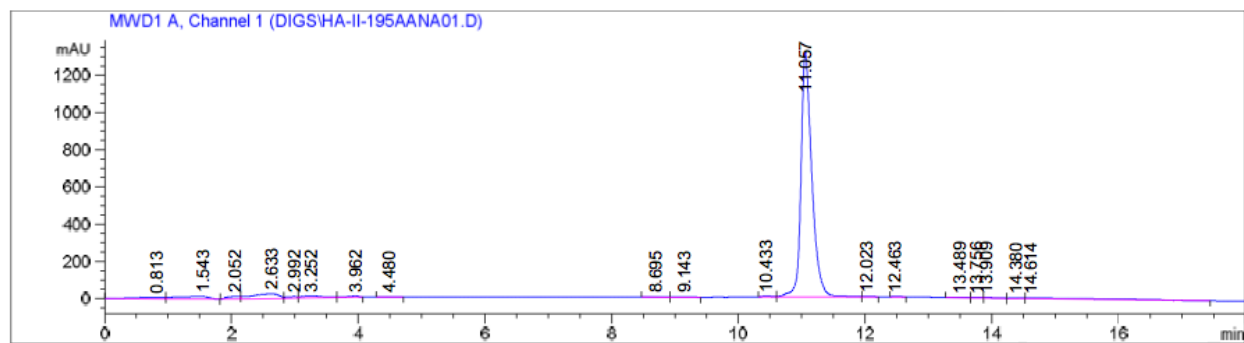

**Fig. S6.** Analytical HPLC trace of HO-(DFAA)<sub>2</sub>-4T, monitoring at 400 nm.

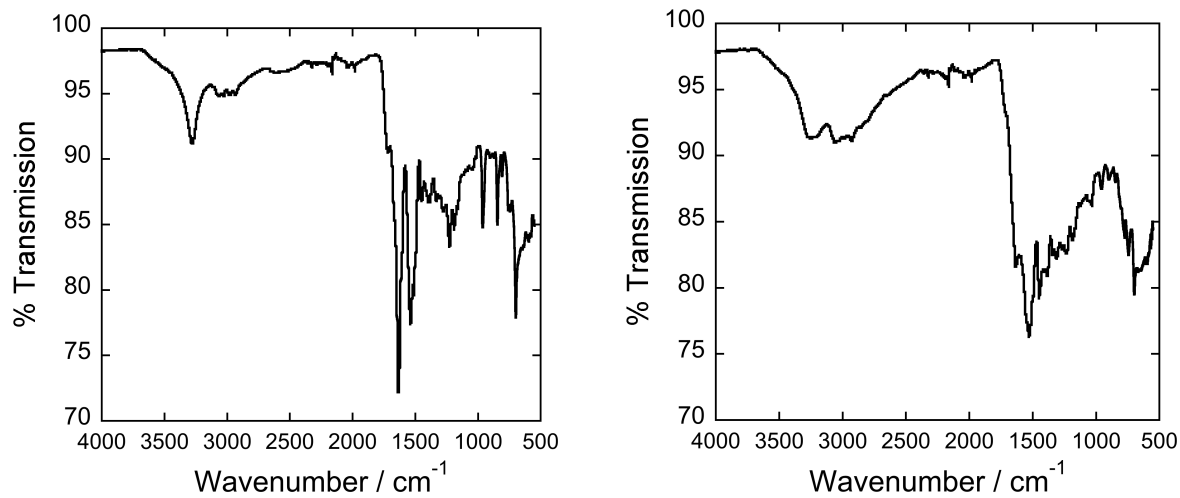

**Fig. S7.** Attenuated total reflectance IR spectra of **OPV3** (*left*) and **4T** (*right*) in solid state.

## SUPPLEMENTARY DATA

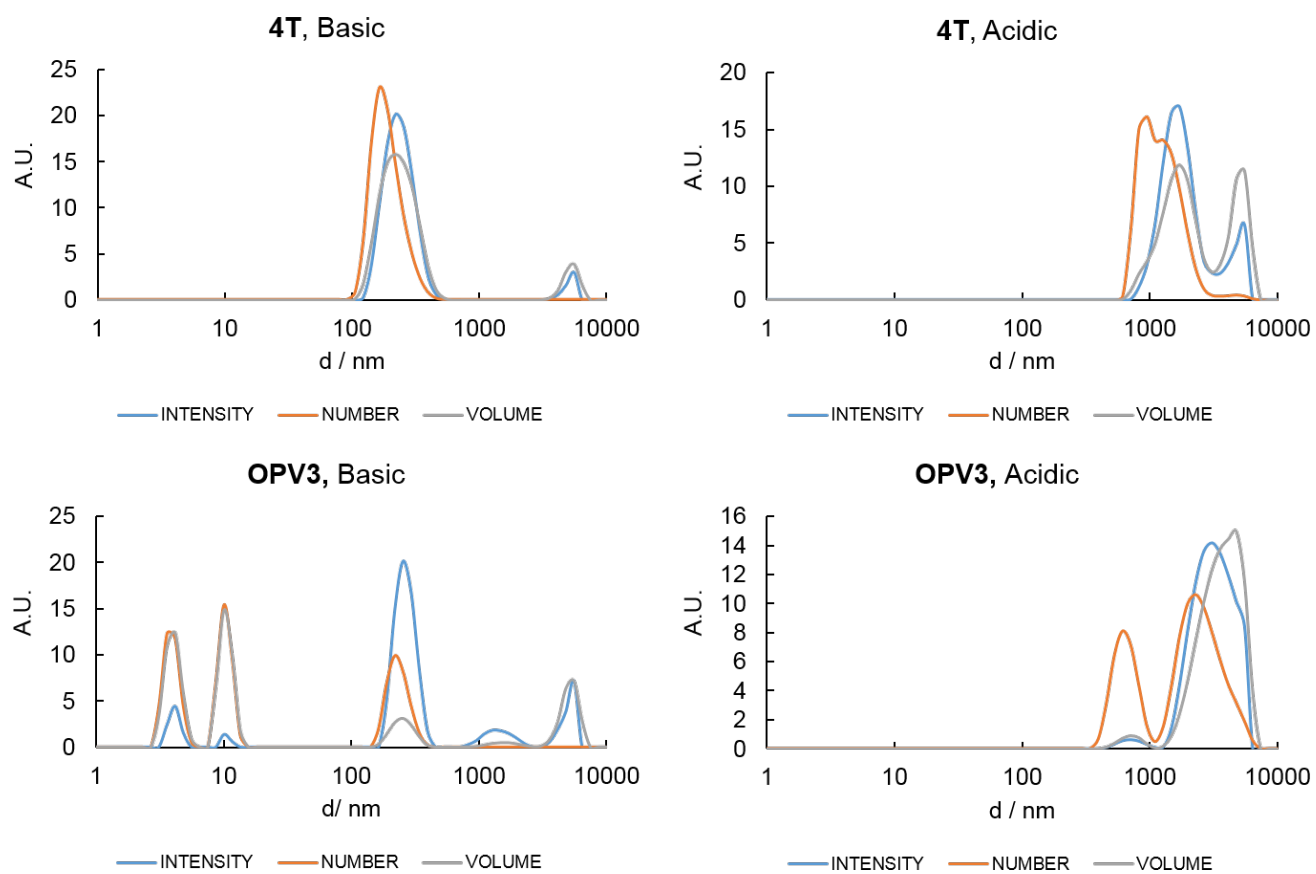

**Fig. S8.** Dynamic light scattering data for 50 $\mu$ M basic and acidic solutions of **OPV3** and **4T**.

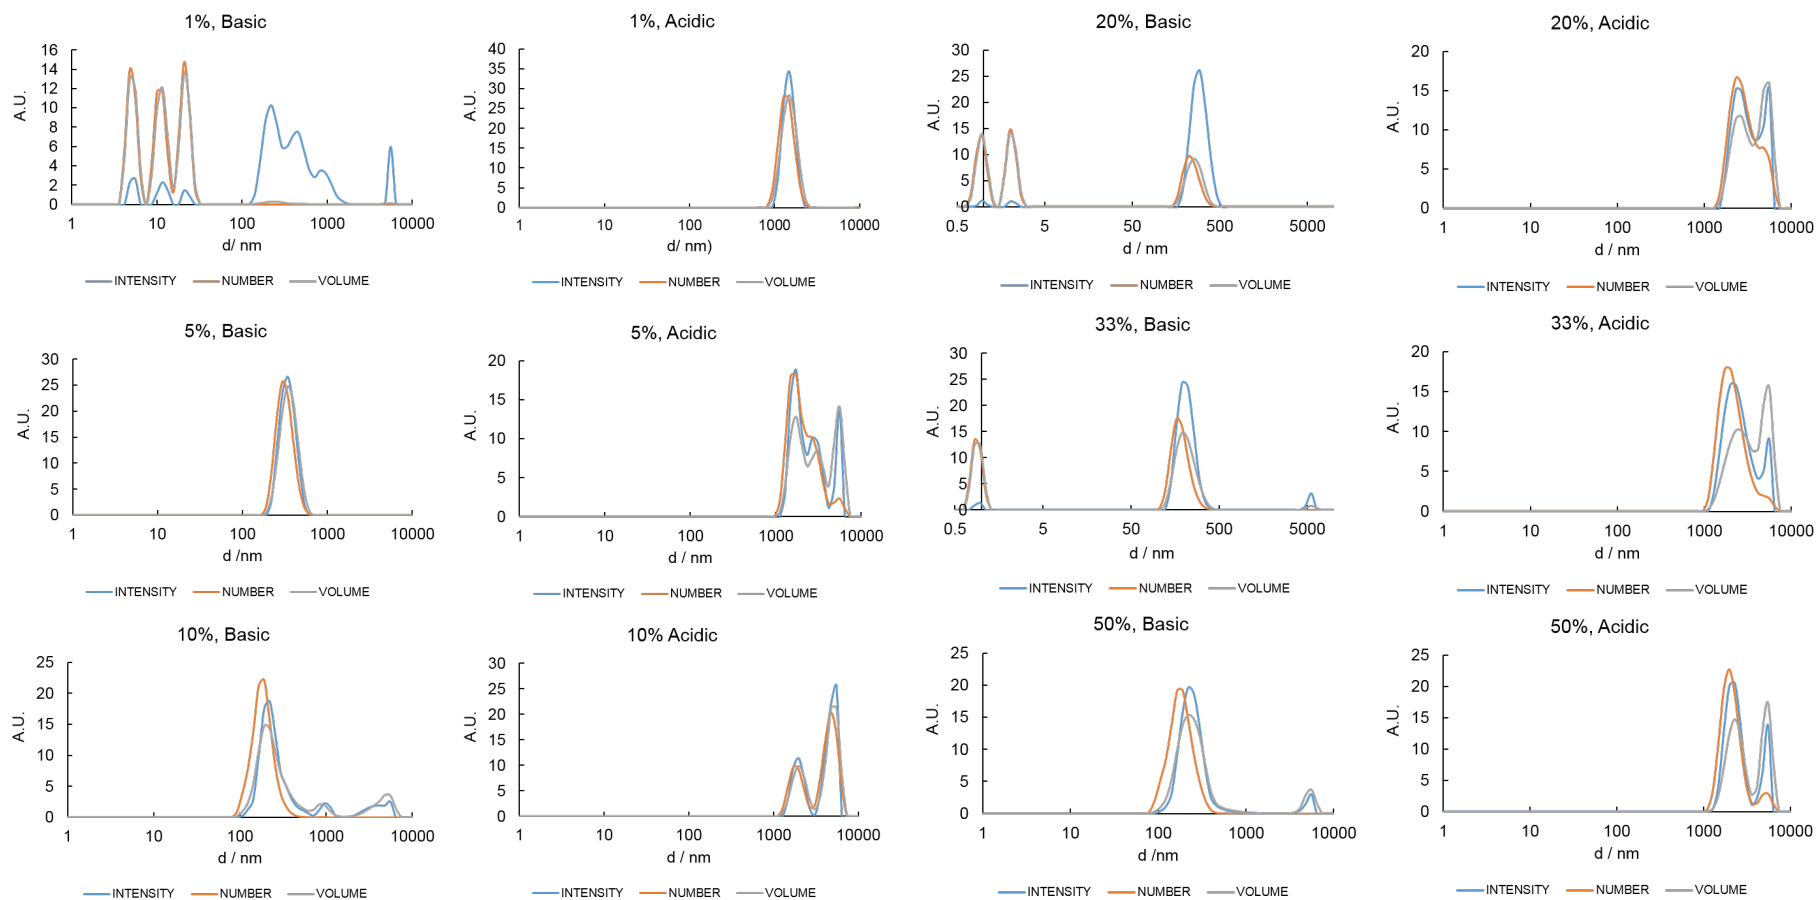

**Fig. S9.** Dynamic light scattering data for 50 $\mu$ M basic and acidic solutions of **OPV3-4T** coassemblies ( $x$  mol% **4T**).

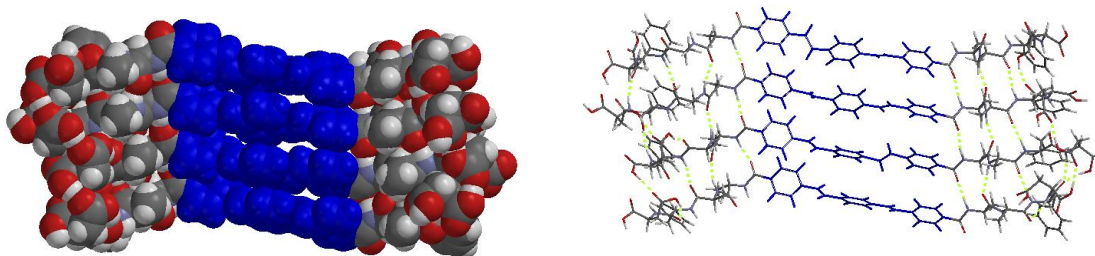

**Fig. S10.** Energy-minimized assembly model for a hypothetical portion of a HO-(DFAA)<sub>2</sub>-**OPV3** assembly; (*left*) space-filling model and (*right*) wire structure showing H-bonds (---).

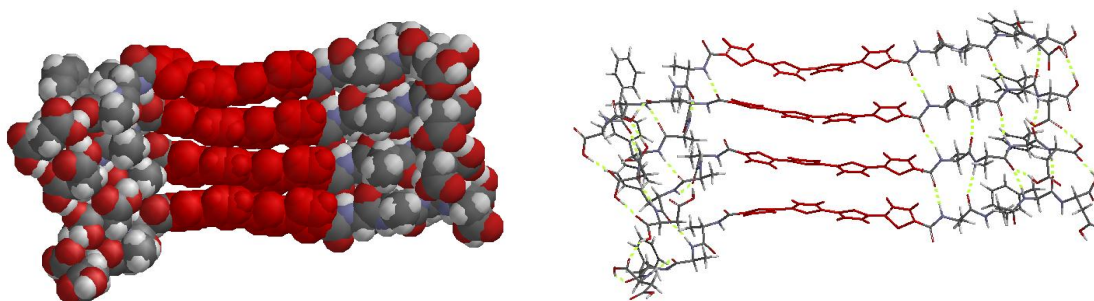

**Fig. S11.** Energy-minimized assembly model for a hypothetical portion of a HO-(DFAA)<sub>2</sub>-**4T** assembly; (*left*) space-filling model and (*right*) wire structure showing H-bonds (---).

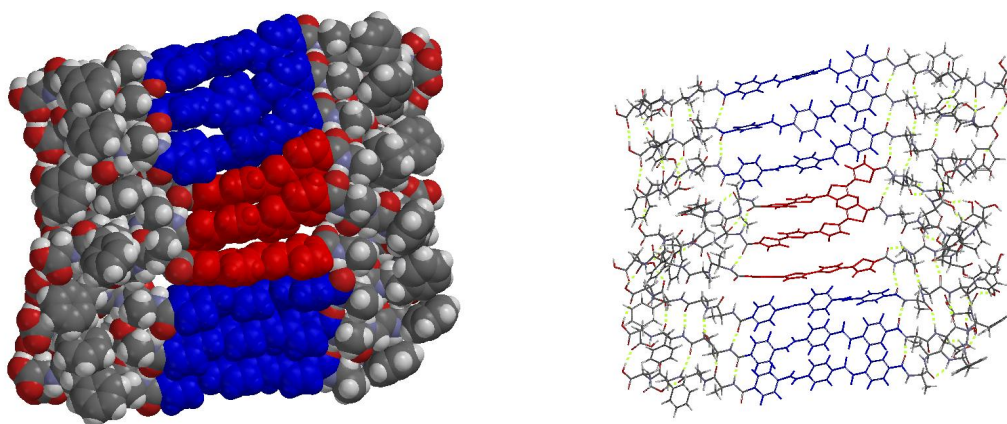

**Fig. S12.** Energy-minimized assembly model for a hypothetical portion of HO-(DFAA)<sub>2</sub>-**4T** and – **OPV3** heterostructure with *multiple* **4T** units within the **OPV3** majority aggregate; (*left*) space-filling model and (*right*) wire structure showing H-bonds (---).



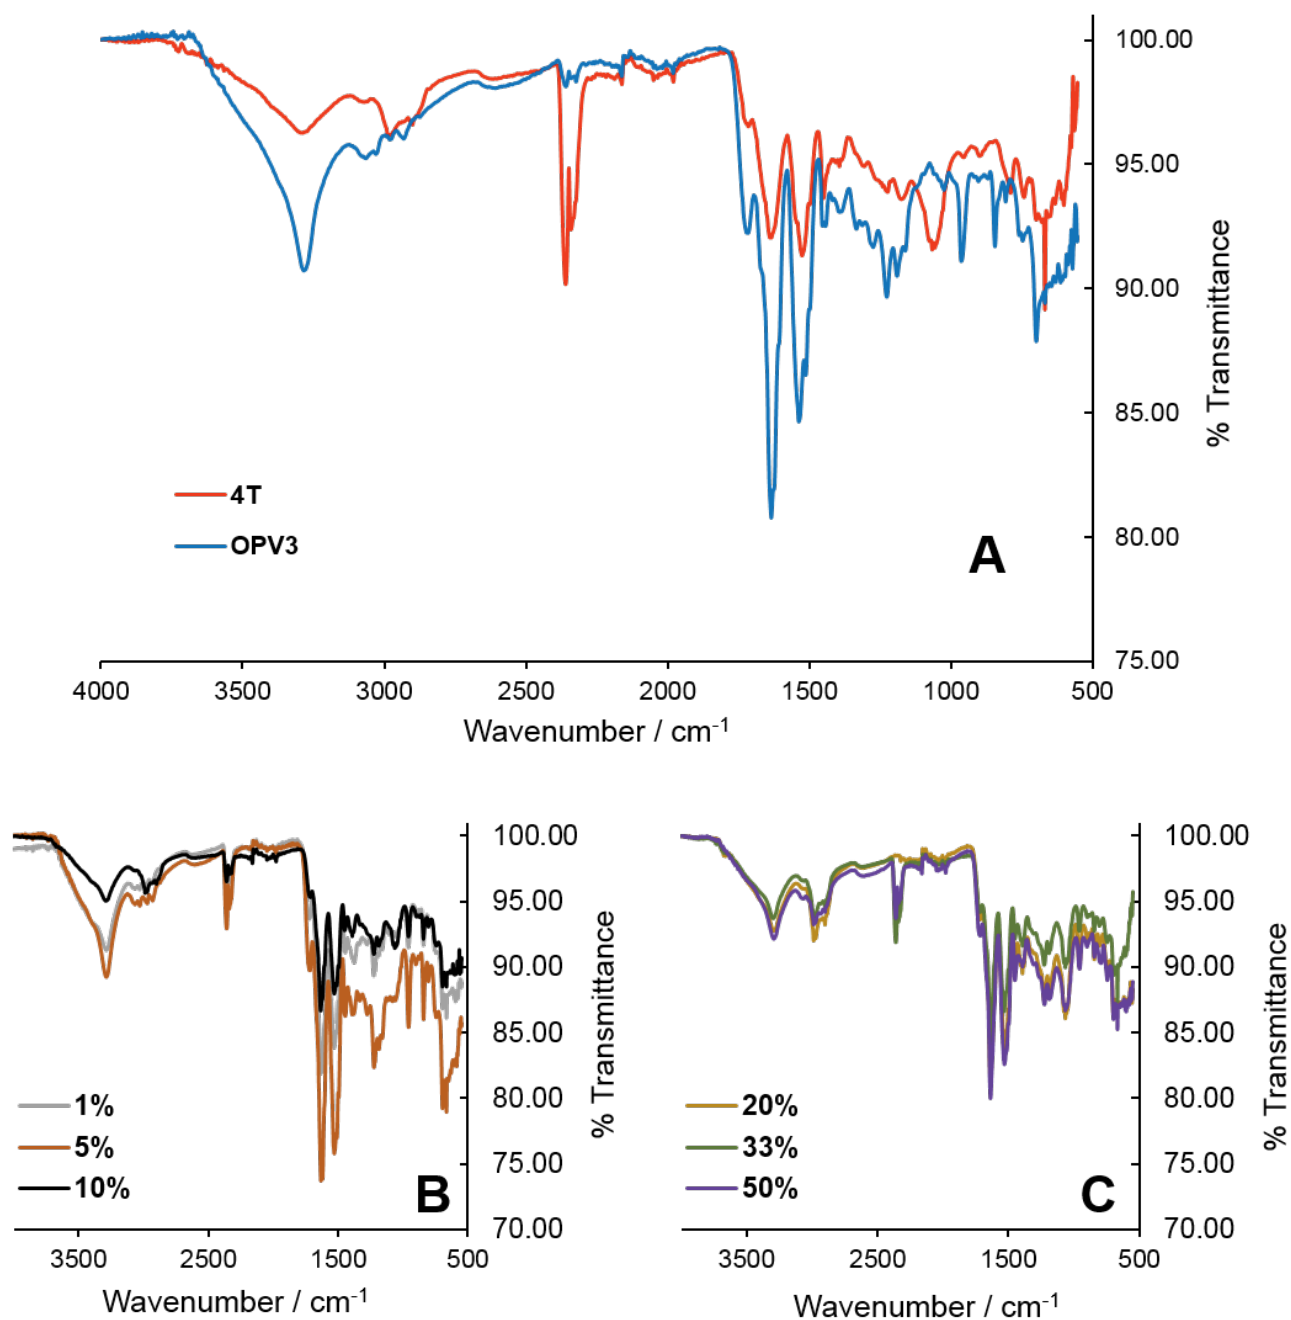

**Fig. S13.** ATR-IR spectra of lyophilized acidic solutions of (a) OPV3, 4T, and (b,c) coassemblies.

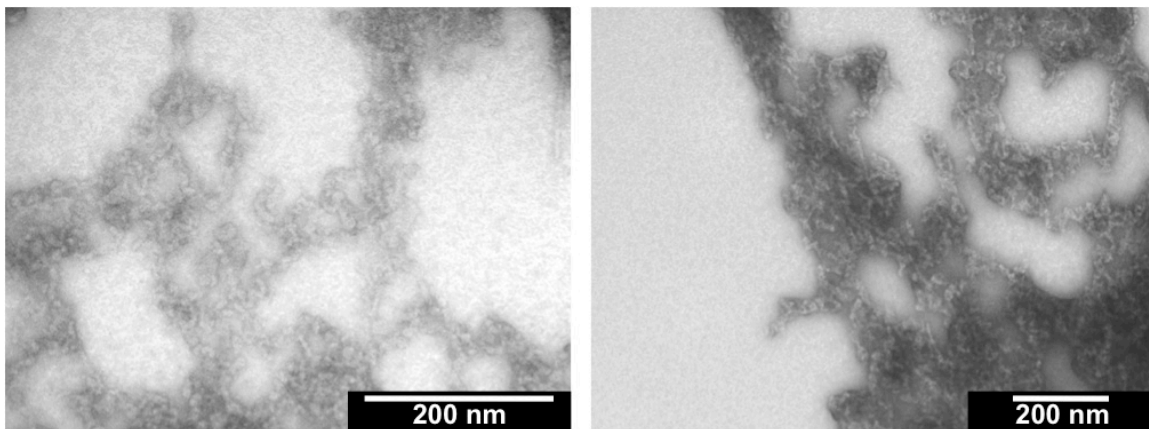

**Fig. S14.** Representative TEM images showing the nanostructures from a 0.1 wt% acidic solution of **4T**.

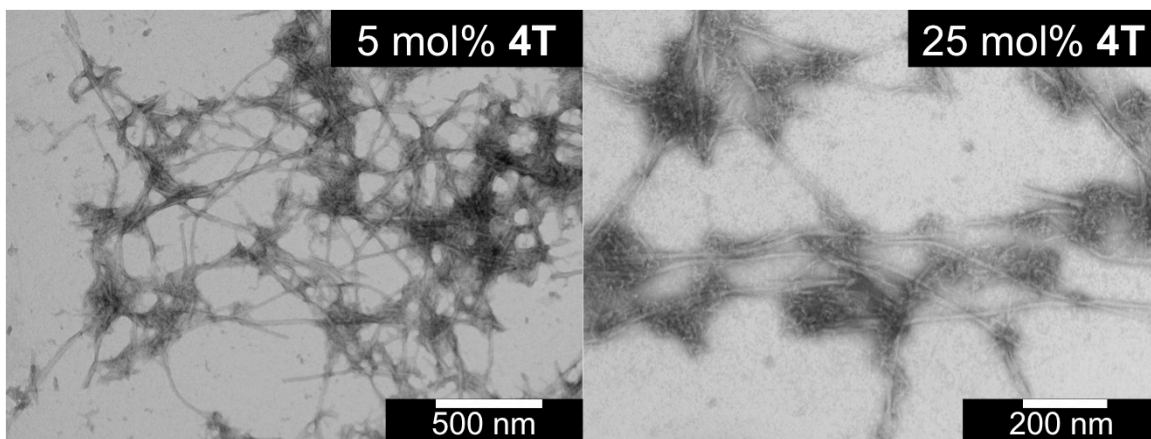

**Fig. S15.** Representative TEM images of the nanostructures from a 0.1 wt% acidic solution of coassembled **OPV3-4T** at different mol% **4T** (widths: 5 mol% **4T**=  $10.8 \pm 1.6$  nm; 25 mol% **4T**=  $13.0 \pm 2.3$  nm).

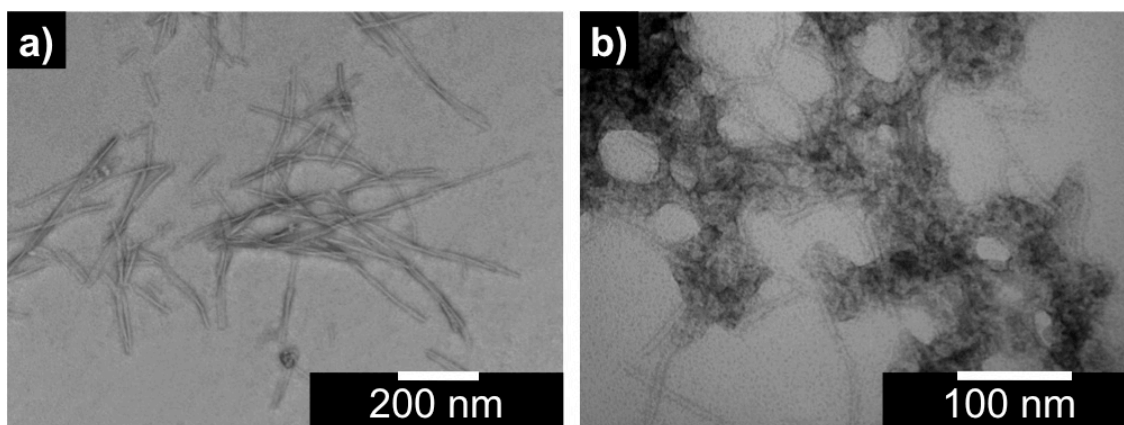

**Fig. S16.** Representative TEM images of the nanostructures from a 0.1 wt% acidic solution of (a) coassembled **OPV3-4T** (1:1) and a solution wherein (b) **4T** was added to pre-assembled **OPV3** solution (1:1).

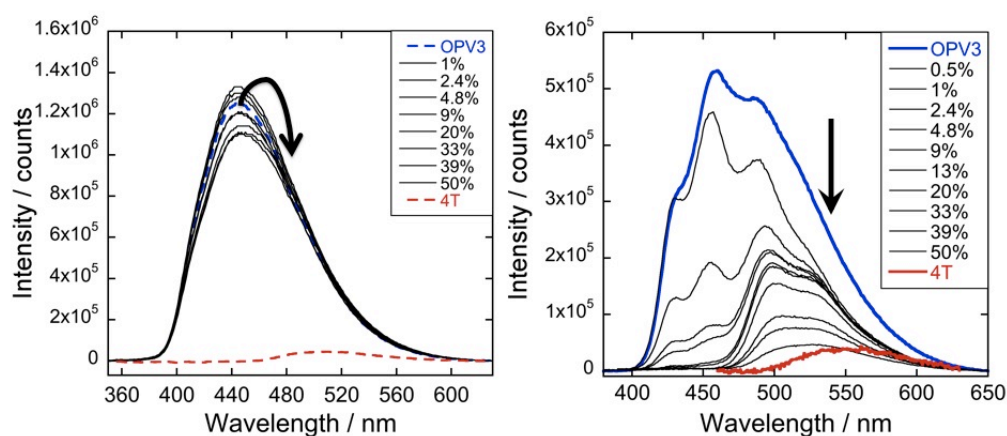

**Fig. S17.** Emission spectra (*ca.* pH 10,  $\lambda_{exc}$ =320 nm (*left*); *ca.* pH 2,  $\lambda_{exc}$ =330 nm, **4T** at 450 (*right*)) of **OPV3**, **4T**, and their coassemblies. These are the same solutions used in Fig. 3, showing all **OPV3:4T** coassembly ratios considered; arrow indicates the general trend as mol% **4T** increases.

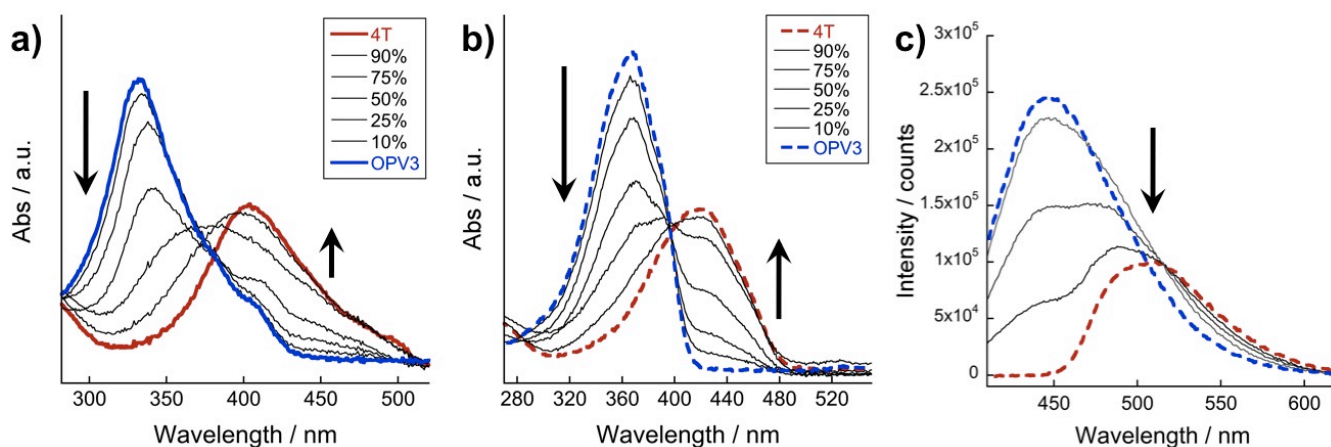

**Fig. S18.** UV-Vis (a,b) and PL (c) spectra for **OPV3:4T** mixtures, keeping the overall chromophore concentration constant under (a) acidic (—) and (b,c) basic (---) conditions; arrow indicates the general trend as mol% **4T** increases.

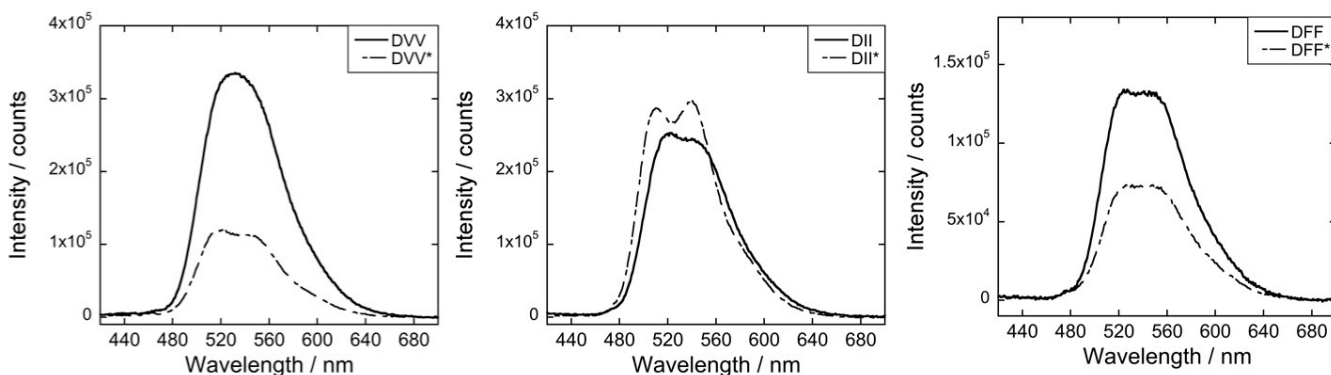

**Fig. S19.** Emission spectra of acidic and annealed HO-(DXX)<sub>2</sub>-4T hydrophobic peptides ( $\lambda_{\text{exc}}=410$  nm).

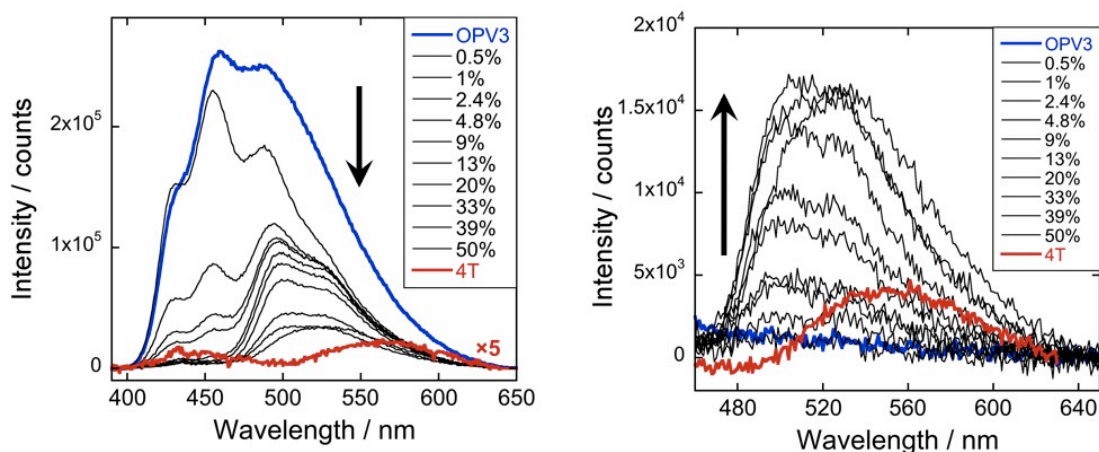

**Fig. S20.** Emission spectra of coassembled **OPV3-4T** acidic solutions, excited at 370 nm (*left*) and 450 nm (*right*); arrows indicate increasing mol% 4T. These are the same acidic solutions used in Fig. 4, showing the absorption and emission spectra of all **OPV3:4T** coassembly ratios considered. (Note that higher energy excitations such as 330 and 380 nm results to a higher energy spectral feature for pure, acidic, 4T solution that does not correspond to the feature observed when excited near its  $\lambda_{\text{max}}$  (450 nm); hence, we used the feature observed at 450 nm excitation wavelength to assign 4T peaks in the spectra of the coassemblies.)

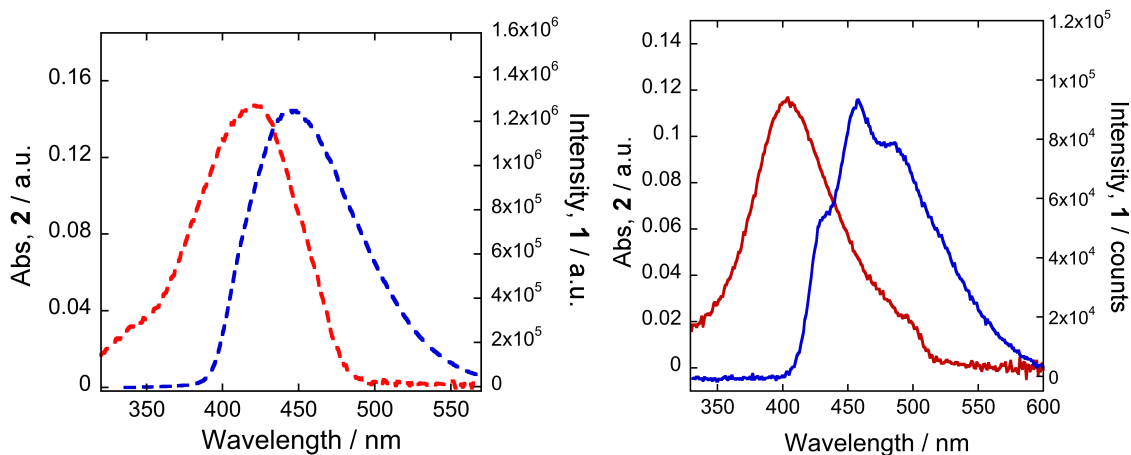

**Fig. S21.** Plots showing the spectral overlap between the donor emission and acceptor absorbance for basic (*left*) and (*right*) acidic solutions.

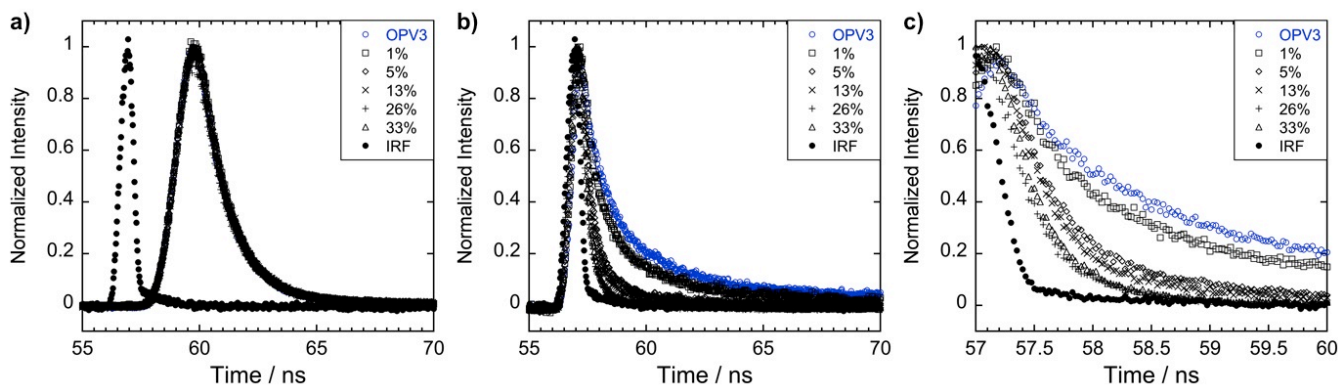

**Fig. S22.** Lifetime decay profiles ( $\lambda_{\text{exc}}=375$  nm) of **OPV3** and coassemblies under (a) basic (*ca.* pH 10) and (b,c) acidic (*ca.* pH 2) conditions.

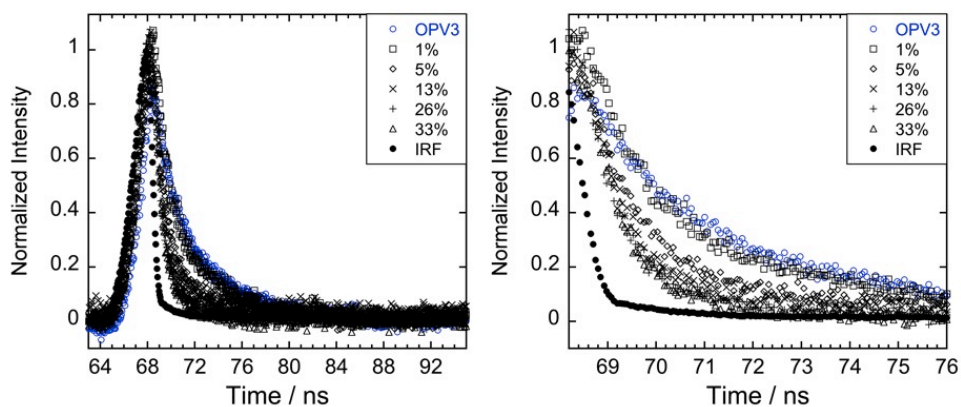

**Fig. S23.** Lifetime decay profiles ( $\lambda_{\text{exc}}=340$  nm) of **OPV3** and coassemblies under acidic (*ca.* pH 2) conditions.

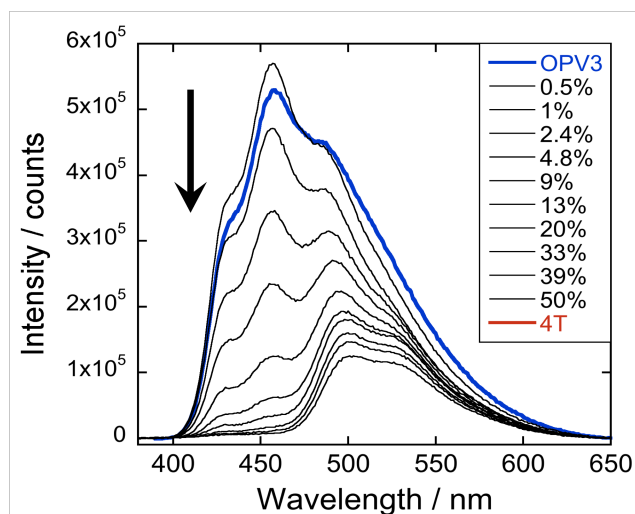

**Fig. S24.** Emission spectra ( $\lambda_{\text{exc}}=330$  nm) of a solution wherein **4T** was titrated with acidic, pre-assembled **OPV3**; arrow indicates increasing mol% **4T**. These are the same acidic solutions used in Fig. 6, showing all **OPV3:4T** coassembly ratios considered.

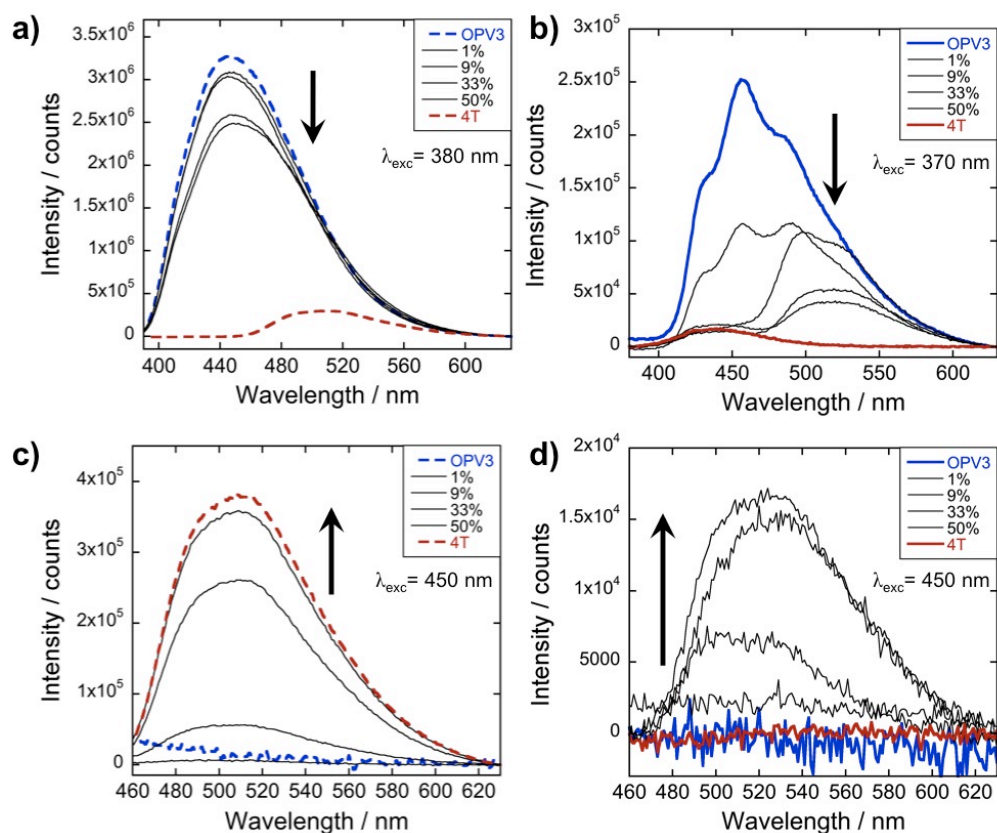

**Fig. S25.** *Reversibility of structure formation using pH control, different  $\lambda_{exc}$ .* Emission spectra when the re-basified (a,c) and reacidified (b,d) solutions are excited at different wavelengths. These are the same solutions used in Fig. 7, showing all **OPV3:4T** coassembly ratios considered; arrows indicate increasing mol% 4T.

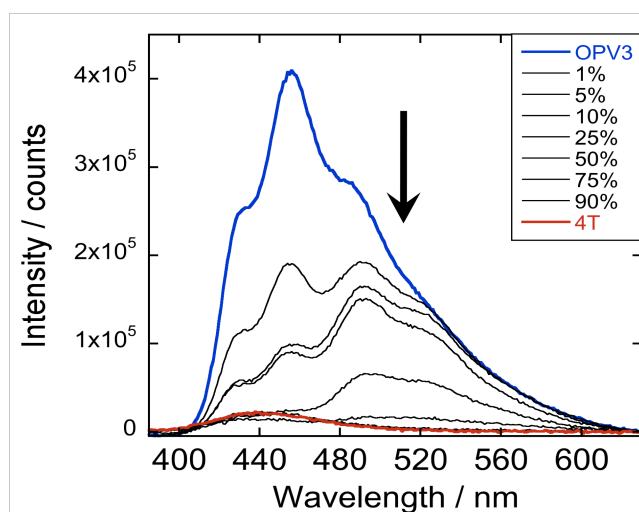

**Fig. S26.** *Titration with annealed samples.* PL spectra ( $\lambda_{exc}=375$  nm) of annealed, acidic samples ( $[\text{OPV3}]=7.4 \mu\text{M}$ ); arrow indicates the trend as mol% 4T increases.

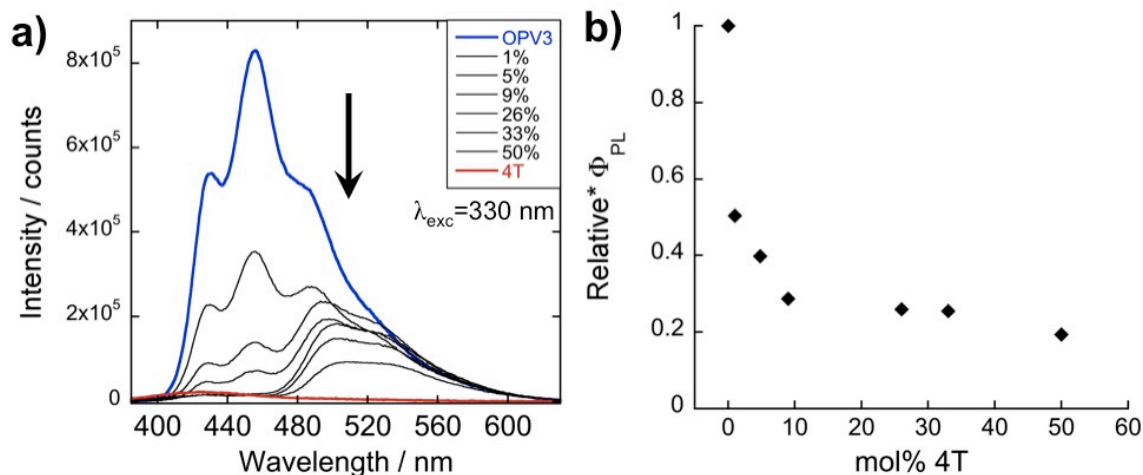

**Fig. S27.** (a) PL spectra ( $\lambda_{exc} = 330$  nm) of acidic samples ( $[OPV3] = 3.2 \mu M$ ) and (b) the corresponding relative quantum yields\* of **OPV3-4T** mixtures relative to **OPV3** after  $\sim 16$  hours of sample preparation; arrow indicates the trend as mol% **4T** increases. At 1 mol% **4T**, the peak area decreased down to 54% with respect to acidic **OPV3**.

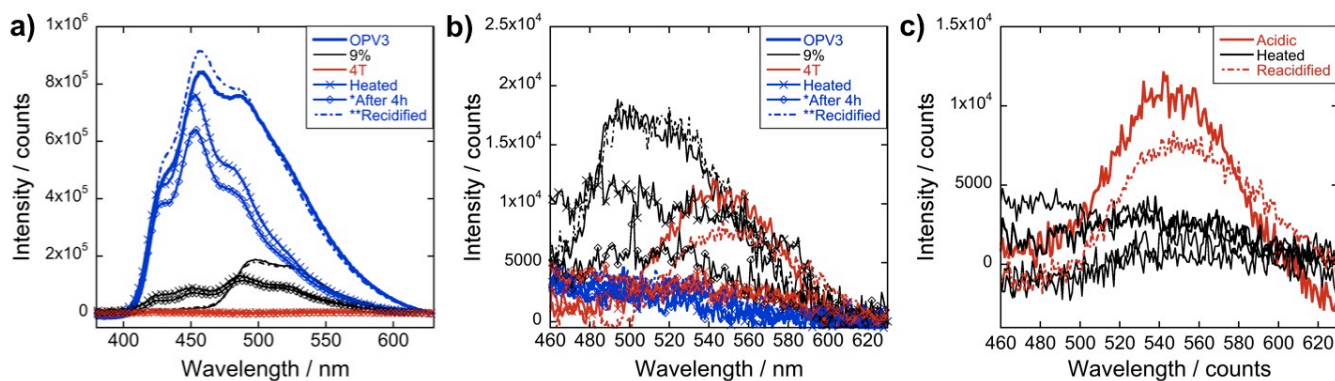

**Fig. S28.** PL monitoring of acidic **OPV3**, 9 mol % **4T** and **4T** solutions during the thermal cycling process ( $\lambda_{exc} =$  (a) 370 nm; (b) 450 nm); (c) showing **4T** emission when excited at 450 nm, including multiple time points during the 4h-cooling process.
